# Supplementary material for: High-temperature exposure during the early embryonic stage lowers core body temperature after growth via a hypothalamic Igfbp2-dependent mechanism
Source: PubMed Central journal article supplement — Sci Rep. 2024 Dec 3;14:29586. doi: 10.1038/s41598-024-80252-1 (PMC11615319; doi:10.1038/s41598-024-80252-1), 2024-12-03
Supplement: 41598_2024_80252_MOESM1_ESM.pdf [file 41598_2024_80252_MOESM1_ESM.pdf]

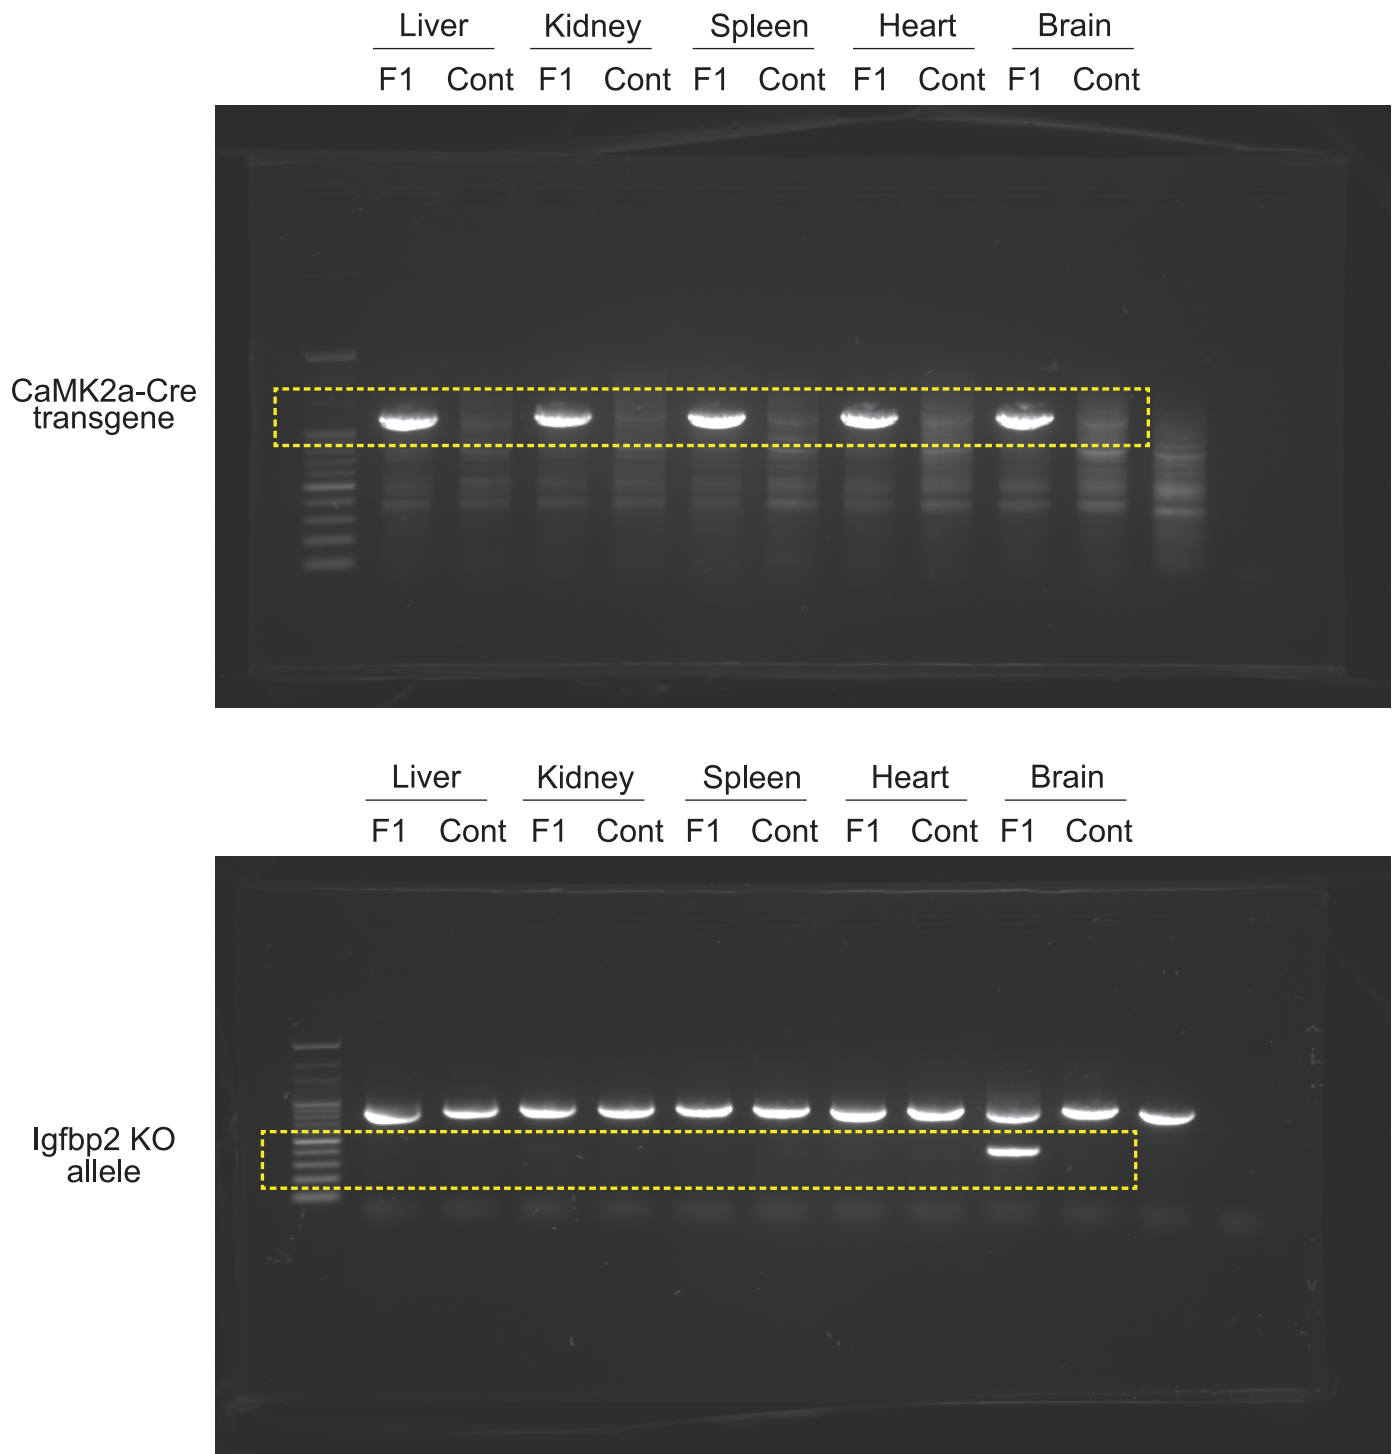

**Figure S1.** Original gels of the different panels presented in Figure 4c. Dotted yellow frames correspond to gels shown in panels of Figure 4c. The electrophoresis of PCR products of CaMK2a-Cre transgene and Igfbp2 KO allele, respectively.

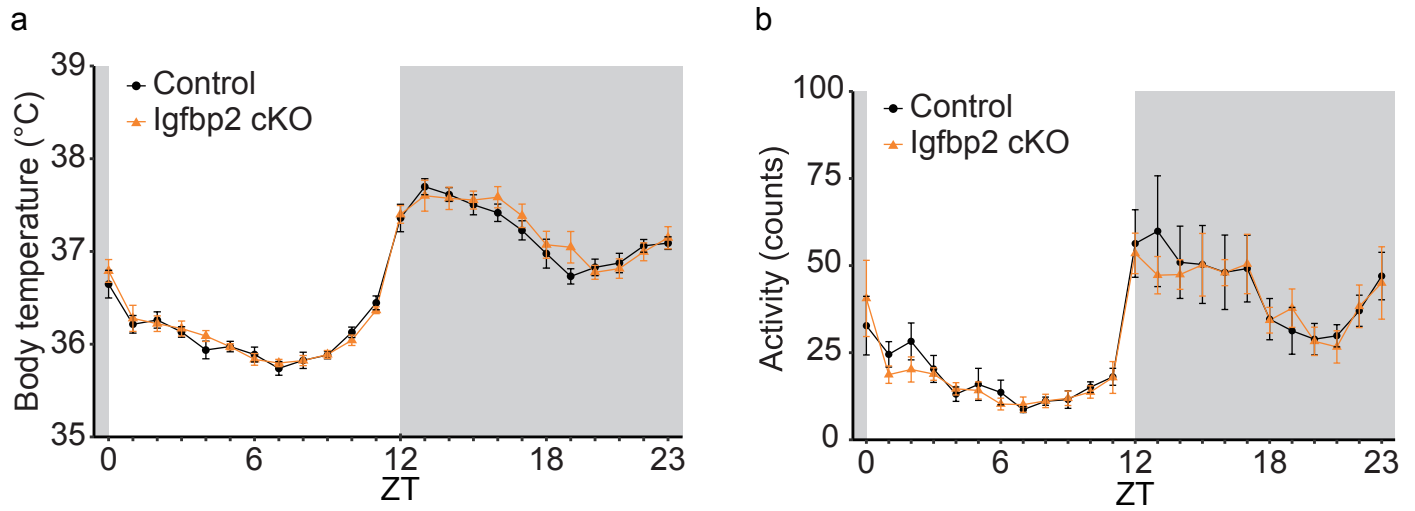

**Figure S2.** Circadian rhythms of core body temperature and activity of Igfbp2 cKO mice born from natural breeding.  
a, b) Circadian rhythms of core body temperature (a) and activity (b) of the male Igfbp2 cKO and the control mice (n=7 in each group) born from natural breeding. Error bar shows SEM.

**Table S1.** Primers for qPCR primers.

| Primer name | Sequence                  | Accession number |
|-------------|---------------------------|------------------|
| RT Igf1 F   | gatctgcctctgtgacttcttg    | NM_001111275     |
| RT Igf1 R   | caatgcctgtctgagggtgccct   |                  |
| RT Igfbp2 F | ctccctgcacatccccaactgtgac | NM_008342        |
| RT Igfbp2 R | ggtattgggggtcacacaccagcac |                  |
| RT Igfr F   | catgtactgtatcccctgcgaag   | NM_010513        |
| RT Igfr R   | catgaagtctccaactccgaggc   |                  |
| RT Insr F   | gctgttgagctggattattgtctc  | NM_010568        |
| RT Insr R   | cactcactggccgagtcgtcatac  |                  |
| RT Igfbp5 F | ggggttgcctcaacgaaaagagc   | NM_010518        |
| RT Igfbp5 R | cggaaatgcgagtgctgctgggc   |                  |
| RT gapdh F  | caacagcaactcccactcttc     | NM_001289726     |
| RT gapdh R  | cctgttgctgtagccgtattc     |                  |

**Table S2.** crRNA, ssDNA and PCR primers used to generate *Igfbp2* floxed mice.

| Sequence name         | Sequence                                                                                                                                                                  | Use for                                       |
|-----------------------|---------------------------------------------------------------------------------------------------------------------------------------------------------------------------|-----------------------------------------------|
| crRNA1                | gagaaggggattgagcgttggg                                                                                                                                                    | Target of gRNA                                |
| crRNA2                | agtgacttccccgccattccagg                                                                                                                                                   | Target of gRNA                                |
| ssDNA1                | caagcgactggcttccgtgagcttcagttccccgcgtgtgaaagagaagg<br>ggatttgagATAACTTCGTATAGCATACATTATACGAAG<br>TTATaagcttcgtgggaccagagtctctttatctctgtgctcagacgcctc<br>tcggaagcctcagggga | loxP KI ssDNA<br>near <i>Igfbp2</i> Ex2       |
| ssDNA2                | agagtcttgggggggatggctgctgagctcatgccacctgtccctaata<br>cctggaaATAACTTCGTATAGCATACATTATACGAAGTT<br>ATggatcctggcggggaagtcactgttccatcttacatggggacaagaaa<br>aaggcttctgaaccag    | loxP KI ssDNA<br>near <i>Igfbp2</i> Ex4       |
| KI check primer F     | ggtattgggggtcacacaccagcac                                                                                                                                                 | Genotyping for floxed<br><i>Igfbp2</i> allele |
| crRNA1 check primer R | cagactgaggtgttggcacccttg                                                                                                                                                  | Genotyping for floxed<br><i>Igfbp2</i> allele |
| crRNA2 check primer F | gtgactctcgatgccagtgagtgattg                                                                                                                                               | Genotyping for WT<br><i>Igfbp2</i> allele     |
| <i>Igfbp2</i> WT R    | cccgccattccaggattagggacaag                                                                                                                                                | Genotyping for WT<br><i>Igfbp2</i> allele     |
| crRNA1 check primer F | ctggtgagggccttggtgtctcttc                                                                                                                                                 | Genotyping for<br><i>Igfbp2</i> KO allele     |
| crRNA2 check primer R | ccagtggtccacactctgtcctcac                                                                                                                                                 | Genotyping for<br><i>Igfbp2</i> KO allele     |
